# Supplementary material for: Complications following immediate compared to delayed deep inferior epigastric artery perforator flap breast reconstructions
Source: Springer Nature journal article supplement (doi:10.1007/s10549-018-4695-0), 2018-02-04
Supplement: MOESM1 [file 15442062]

## Online Resource 1: Patient as unit of analysis

**Article title:**

Complications of immediate compared to delayed deep inferior epigastric artery perforator flap breast reconstructions

**Journal name:**

Breast Cancer Research and Treatment

**Author names:**

J. Beugels<sup>\*1,2</sup>, L. Bod<sup>3</sup>, S.M.J. van Kuijk<sup>4</sup>, S.M.H. Tuinder<sup>1</sup>, S.S. Qiu<sup>1</sup>, E.M. Heuts<sup>3</sup>, A. Piatkowski<sup>1,5</sup>, R.R.W.J. van der Hulst<sup>1,5,6</sup>

**Affiliations:**

<sup>1)</sup> Department of Plastic, Reconstructive and Hand Surgery, Maastricht University Medical Center, Maastricht, the Netherlands

<sup>2)</sup> GROW – School for Oncology and Developmental Biology, Maastricht University Medical Center, Maastricht, the Netherlands

<sup>3)</sup> Department of Surgery, Maastricht University Medical Center, Maastricht, the Netherlands

<sup>4)</sup> Department of Clinical Epidemiology and Medical Technology Assessment (KEMTA), Maastricht University Medical Center, Maastricht, the Netherlands

<sup>5)</sup> Department of Plastic, Reconstructive and Hand Surgery, VieCuri Medical Center, Venlo, the Netherlands

<sup>6)</sup> Department of Plastic, Reconstructive and Hand Surgery, Zuyderland Medical Center, Sittard-Geleen, the Netherlands

**\* Corresponding author:**

Jop Beugels, *M.D.*

Department of Plastic, Reconstructive and Hand Surgery, Maastricht University Medical Centre, P.O. Box 5800, 6202, AZ, Maastricht, the Netherlands. (+31) 43 387 7481; [jop.beugels@mumc.nl](mailto:jop.beugels@mumc.nl)

**Table 1. Recipient-site complications (n = 737 patients)**

|                         | Timing of reconstruction |                    | OR (95% CI)      | p value | Adjusted OR (95% CI) <sup>a</sup> | Adjusted p value <sup>a</sup> |
|-------------------------|--------------------------|--------------------|------------------|---------|-----------------------------------|-------------------------------|
|                         | Immediate                | Delayed            |                  |         |                                   |                               |
|                         | (n = 291)<br>n (%)       | (n = 446)<br>n (%) |                  |         |                                   |                               |
| Major complication (≥1) | 33 (11.3)                | 52 (11.7)          | 0.97 (0.61-1.54) | 0.895   | 0.77 (0.47-1.29)                  | 0.320                         |
| Total flap loss         | 6 (2.1)                  | 13 (2.9)           | 0.70 (0.26-1.87) | 0.477   | 0.46 (0.20-1.10)                  | 0.081                         |
| Partial flap loss       | 13 (4.5)                 | 25 (5.6)           | 0.79 (0.40-1.57) | 0.496   | 0.72 (0.33-1.58)                  | 0.415                         |
| Venous congestion       | 18 (6.2)                 | 21 (4.7)           | 1.33 (0.70-2.55) | 0.383   | 0.93 (0.47-1.85)                  | 0.842                         |
| Minor complication (≥1) | 83 (28.5)                | 121 (27.1)         | 1.07 (0.77-1.49) | 0.680   | 1.11 (0.78-1.59)                  | 0.552                         |
| Infection               | 23 (7.9)                 | 37 (8.3)           | 0.95 (0.55-1.63) | 0.849   | 1.03 (0.57-1.87)                  | 0.922                         |
| Hematoma                | 34 (11.7)                | 17 (3.8)           | 3.34 (1.83-6.10) | <0.001  | 3.03 (1.60-5.73)                  | 0.001                         |
| Seroma                  | 11 (3.8)                 | 4 (0.9)            | 4.34 (1.37-13.8) | 0.013   | 4.92 (1.24-19.6)                  | 0.024                         |
| Fat necrosis            | 36 (12.4)                | 63 (14.1)          | 0.86 (0.55-1.33) | 0.495   | 0.87 (0.55-1.38)                  | 0.554                         |
| Wound problems          | 31 (10.7)                | 77 (17.3)          | 0.57 (0.37-0.89) | 0.014   | 0.62 (0.39-0.98)                  | 0.041                         |

<sup>a</sup> Adjusted for unilateral vs. bilateral reconstruction, body mass index (kg/m<sup>2</sup>), smoking status (yes vs. no), radiation therapy (yes vs. no), chemotherapy (yes vs. no), endocrine therapy (yes vs. no), and university vs. community hospital.

**Table 2. Subgroup analysis recipient-site complications of breast cancer patients only (n = 664 patients)**

|                         | Timing of reconstruction |                    | OR (95% CI)      | p value | Adjusted OR (95% CI) <sup>a</sup> | Adjusted p value <sup>a</sup> |
|-------------------------|--------------------------|--------------------|------------------|---------|-----------------------------------|-------------------------------|
|                         | Immediate                | Delayed            |                  |         |                                   |                               |
|                         | (n = 234)<br>n (%)       | (n = 430)<br>n (%) |                  |         |                                   |                               |
| Major complication (≥1) | 21 (9.0)                 | 48 (11.2)          | 0.79 (0.46-1.35) | 0.378   | 0.73 (0.41-1.30)                  | 0.279                         |
| Total flap loss         | 2 (0.9)                  | 12 (2.8)           | 0.30 (0.07-1.35) | 0.117   | 0.25 (0.06-1.16)                  | 0.076                         |
| Partial flap loss       | 8 (3.4)                  | 24 (5.6)           | 0.60 (0.27-1.36) | 0.218   | 0.56 (0.22-1.41)                  | 0.219                         |
| Venous congestion       | 12 (5.1)                 | 19 (4.4)           | 1.17 (0.56-2.45) | 0.679   | 1.07 (0.51-2.23)                  | 0.865                         |
| Minor complication (≥1) | 65 (27.8)                | 114 (26.5)         | 1.07 (0.75-1.52) | 0.725   | 1.19 (0.81-1.73)                  | 0.375                         |
| Infection               | 19 (8.1)                 | 36 (8.4)           | 0.97 (0.54-1.73) | 0.910   | 1.09 (0.59-2.02)                  | 0.786                         |
| Hematoma                | 29 (12.4)                | 14 (3.3)           | 4.20 (2.17-8.13) | <0.001  | 3.97 (2.03-7.76)                  | <0.001                        |
| Seroma                  | 7 (3.0)                  | 3 (0.7)            | 4.39 (1.12-17.1) | 0.033   | 7.97 (1.93-32.8)                  | 0.004                         |
| Fat necrosis            | 28 (12.0)                | 61 (14.2)          | 0.82 (0.51-1.33) | 0.423   | 0.87 (0.53-1.43)                  | 0.594                         |
| Wound problems          | 21 (9.0)                 | 74 (17.2)          | 0.47 (0.28-0.79) | 0.004   | 0.55 (0.33-0.93)                  | 0.025                         |

<sup>a</sup> Adjusted for unilateral vs. bilateral reconstruction, body mass index (kg/m<sup>2</sup>), smoking status (yes vs. no), radiation therapy (yes vs. no), chemotherapy (yes vs. no), endocrine therapy (yes vs. no), and university vs. community hospital.

**Table 3. Flap re-explorations (n = 737 patients)**

|                                    | Timing of reconstruction        |                               | p value            |
|------------------------------------|---------------------------------|-------------------------------|--------------------|
|                                    | Immediate<br>(n = 291)<br>n (%) | Delayed<br>(n = 446)<br>n (%) |                    |
| Re-exploration                     | 28 (9.6)                        | 37 (8.3)                      | 0.535              |
| Reanastomosis                      | 19 (6.5)                        | 20 (4.5)                      | 0.228              |
| Reason re-exploration              |                                 |                               |                    |
| Arterial insufficiency             | 4 (1.4)                         | 11 (2.5)                      | 0.305              |
| Venous insufficiency               | 19 (6.5)                        | 20 (4.5)                      | 0.225              |
| Hematoma                           | 7 (2.4)                         | 6 (1.3)                       | 0.285              |
| Kinking                            | 4 (1.4)                         | 5 (1.1)                       | 0.745 <sup>a</sup> |
| Infection                          | 0 (0)                           | 1 (0.2)                       | 1.000 <sup>a</sup> |
| Other                              | 1 (0.3)                         | 2 (0.4)                       | 1.000 <sup>a</sup> |
| Result re-exploration <sup>b</sup> |                                 |                               |                    |
| Viable flap                        | 20 (71.5)                       | 21 (56.8)                     | 0.225              |
| Partial flap loss                  | 2 (7.1)                         | 8 (21.6)                      | 0.167 <sup>a</sup> |
| Total flap loss                    | 6 (21.4)                        | 8 (21.6)                      | 0.985              |

<sup>a</sup> Fisher's Exact test was used.  
<sup>b</sup> As a percentage of the total flaps that required re-exploration (immediate group: n = 28; delayed group: n = 37).
